**Title:** Associations between Psychological Factors and Long-Term Dizziness Handicap in Vestibular Schwannoma Patients: A Cross-Sectional Study

**Authors:** M. Rutenkröger, PhD, M. Scheer, MD<sup>2</sup>, S. Rampp<sup>2,3,4</sup>, MD, C. Strauss<sup>2</sup>, MD, R. Schönfeld<sup>5</sup>, PhD, B. Leplow<sup>5</sup>, PhD

**Affiliations:**

<sup>1</sup> Department of Medical Psychology, University Medical Center Hamburg-Eppendorf, Martinistraße 52, 20246 Hamburg

<sup>2</sup> Department of Neurosurgery, University Hospital Halle, Ernst-Grube-Straße 40, 06120 Halle

<sup>3</sup> Department of Neurosurgery, University Hospital Erlangen, Schwabachanlage 6, 91054 Erlangen

<sup>4</sup> Department of Neuroradiology, University Hospital Erlangen, Schwabachanlage 6, 91054 Erlangen, Germany

<sup>5</sup> Department of Psychology, Martin-Luther-Universität Halle-Wittenberg, Emil-Abderhalden-Straße 26-27, 06108 Halle

Corresponding Author's name and current institution: Mareike Rutenkröger, Department of Medical Psychology, University Medical Center Hamburg-Eppendorf, Martinistraße 52, 20246 Hamburg

Corresponding Author's Email: [m.rutenkroeger@uke.de](mailto:m.rutenkroeger@uke.de)

Corresponding Author's ORCID: <https://orcid.org/0000-0002-2122-6661>

**Keywords:** vestibular schwannoma, dizziness, vertigo, microsurgery, personality, psychological factors

Abstract word count: 249

Text word count: 3759

Number of tables and/or figures: 3

Number of videos: 0

## Abstract

**Background:** Vestibular schwannoma (VS) often results in persistent dizziness that negatively impacts quality of life (QoL). While physical effects are well-documented, the influence of psychological factors on dizziness severity is less studied. This study investigates how psychological characteristics affect dizziness in VS patients.

**Methods:** In this cross-sectional study, 93 VS patients were analyzed, with 77 (82.8%) reporting postoperative dizziness. Psychological factors, including premorbid disorders, personality traits, somatization, and current depression and anxiety levels, were assessed using self-report questionnaires. Correlations between these factors and dizziness severity, measured by the Dizziness Handicap Inventory (DHI), were examined.

**Results:** Patients with postoperative dizziness had higher depression levels and a greater prevalence of preoperative dizziness compared to those without postoperative dizziness. Significant correlations were found between dizziness severity and psychological factors: conscientiousness ( $r = .30$ ,  $p = .03$ ), social support ( $r = .32$ ,  $p = .03$ ), and the HADS total score ( $r = .36$ ,  $p = .01$ ). Emotional aspects of dizziness (DHI-E) were correlated with somatization ( $r = .27$ ,  $p = .04$ ) and anxiety ( $r = .40$ ,  $p = .01$ ). Functional aspects (DHI-F) were linked to conscientiousness ( $r = .31$ ,  $p = .03$ ) and depression ( $r = .26$ ,  $p = .06$ ).

**Conclusion:** Psychological factors significantly impact dizziness severity in VS patients. Incorporating psychological assessments and interventions, such as cognitive-behavioral therapy and combined vestibular and psychological rehabilitation, may improve treatment outcomes and QoL. Further research is needed to assess the effectiveness of these approaches and their impact on the relationship between psychological factors and dizziness.

## 1 **Introduction**

2 A vestibular schwannoma (VS), also referred to as an acoustic neuroma, is a benign neoplasm  
3 that arises from the Schwann cells of the vestibulocochlear nerve. While the primary  
4 consequence of this condition is often auditory, many patients also present with dizziness and  
5 vertigo, which may persist after or be induced by microsurgery or radiation treatment (1–3).  
6 Conservative VS management (“wait-and-scan”) seems to have no impact on the prevalence of  
7 these symptoms, as well as postural sway and canal paresis (4). The severity of these vestibular  
8 symptoms is variable, but they frequently have a long-lasting impact on patients’ quality of life  
9 (QoL) across multiple domains (2,3,5).

10 As identified by Carlson et al. (5), the strongest predictors of long-term QoL reduction in  
11 patients with sporadic VS are ongoing dizziness and headache. In comparison, the impact of  
12 hearing loss, facial nerve function, and tinnitus was shown to be less significant (5). Dizziness  
13 is significantly correlated with challenges in performing routine tasks, which can lead to a  
14 deterioration in physical well-being, an increased reliance on external assistance, and  
15 occupational limitations (6). It has been demonstrated that dizziness is linked to elevated levels  
16 of anxiety, depression, and diminished cognitive function, which serves to further exacerbate  
17 the decline in QoL (6,7). Furthermore, balance disorders were found to be associated with  
18 anxiety and depression, as well as with greater daily consequences and a denial coping response  
19 (8). In an experimental setting, the presence of anxiety symptoms during a vestibular stimulus  
20 may contribute to a priming effect that could explain the observed worsening of balance  
21 function (9).

22 In addition to the dizziness associated with VS, it has also been shown that somatoform  
23 complaints in individuals experiencing dizziness are highly prevalent. The presence of certain  
24 factors, such as personality characteristics or accompanying psychopathology, has been  
25 identified as influencing the prevalence of these complaints (10). Research on chronic  
26 subjective dizziness (11) and persistent postural-perceptual dizziness (PPPD) (12) has revealed  
27 that anxiety, neuroticism, and somatic symptom burden are markedly elevated in individuals  
28 with these conditions. Patients with PPPD also exhibited diminished levels of conscientiousness  
29 in comparison to the control group (12). In the aftermath of acute vestibular events,  
30 psychological and behavioral responses, along with brain maladaptation, were shown to be the  
31 most probable predictors of PPPD (13). Furthermore, a correlation was identified between  
32 benign paroxysmal positional vertigo and the presence of comorbid major depressive disorder,

33 generalized anxiety disorder, and obsessive-compulsive personality disorders when compared  
34 to the findings in a control group (14).

35 Given the lack of comprehensive examination of psychological factors in this area, the objective  
36 of this study was to evaluate the differential impact of these factors on dizziness and to ascertain  
37 the potential interplay between psychological characteristics and the severity of dizziness  
38 handicap. Specifically, the present study aimed to: 1) elucidate the distinctions between VS  
39 patients with and without postoperative dizziness. Accordingly, our investigation concentrated  
40 on the incidence of premorbid psychological disorders and ailments, personality traits,  
41 somatization tendencies, and the current levels of depression and anxiety. And, 2) examine the  
42 relationships between the intensity of dizziness handicap and these psychological variables as  
43 well as sociodemographic variables (age, gender) and tumor size within the group of individuals  
44 affected by dizziness.

## 45 **Materials and Methods**

46 This cross-sectional, single-center investigation was conducted at University Hospital Halle  
47 (Saale), Germany, as part of a broader study that also explored psychological factors and their  
48 associations with postoperative headache and tinnitus in patients with VS patients (15). The  
49 inclusion criteria were as follows: individuals with a confirmed diagnosis of vestibular  
50 schwannoma (VS), aged 18 or above at the time of diagnosis, undergoing retrosigmoid surgery,  
51 and possessing proficiency in the German language. Patients were excluded if they had  
52 undergone prior surgical procedures or radiation therapy, if they had a history of recurrent VS,  
53 if they had been diagnosed with additional oncological conditions, or if they had been diagnosed  
54 with neurofibromatosis type 2. The advent of the SARS-CoV-2 pandemic precipitated a  
55 postponement in the recruitment of subjects, with recruitment commencing on 01/05/2020, and  
56 concluding on 31/08/2020. The initial stage of participant engagement was conducted through  
57 direct approaches during resident consultations at University Hospital Halle, and an online  
58 survey (*SoSciSurvey*) comprising identical questions was administered by *Vereinigung*  
59 *Akustikus Neurinom e.V.* (a non-profit patient self-help organization). Prior to participation, all  
60 subjects provided written informed consent. The study was approved by the Ethics Committee  
61 of University Hospital Halle (No. 2020-008).

### 62 *Measures*

63 A self-administered survey was employed to collect data pertaining to demographic  
64 characteristics (e.g., age and gender), psychological aspects (including premorbid

65 psychological diagnoses such as anxiety disorders or other mental conditions such as sleep  
66 disturbances), and treatment details (e.g., surgical approach, craniotomy vs. craniectomy). The  
67 survey consisted of binary questions (yes/no), with the option of providing additional details  
68 when necessary (e.g., "Specify the diagnosed psychological disorder"). Tumor size was  
69 evaluated according to the Koos grading system, which ranges from 1 to 4 (16).

70 The German version of the Dizziness Handicap Inventory, known as DHI-G (17), was  
71 employed for the purpose of evaluating the extent of disability associated with dizziness. The  
72 scale comprises 25 items, with a score of 4 allocated to affirmative responses, 2 to "sometimes"  
73 responses, and 0 to negative responses. The total score ranges from 0, indicating no disability,  
74 to 100, reflecting severe disability. The questionnaire is comprised of three subscales: a seven-  
75 item physical subscale, a nine-item emotional subscale, and a nine-item functional subscale.  
76 The DHI-G has been demonstrated to perform reliably, and it is therefore recommended as a  
77 suitable assessment tool for gauging disability in individuals experiencing dizziness and  
78 unsteadiness.

79 The Glasgow Benefit Inventory (GBI) is a validated questionnaire comprising 18 items that is  
80 utilized to assess patients' perceived health benefits (PHB) post-intervention, such as surgery.  
81 GBI scores range from -100 to +100, with a score of 0 indicating no perceived benefit, +100  
82 signifying the highest level of benefit, and negative scores suggesting a decline in health.  
83 Principal component analysis revealed that the Glasgow Benefit Inventory items consistently  
84 fell into three distinct subscales. The first subscale, labeled "General," comprised twelve  
85 questions related to overall health changes, both general and psychosocial. The second subscale,  
86 labeled "Social," included three questions addressing the necessary social support for the  
87 specific condition at hand. The final subscale, labeled "Physical," included three questions  
88 focusing on changes in physical health status, including medication requirements and doctor  
89 visits (18).

90 In order to assess the Big Five personality traits in accordance with the framework established  
91 by McCrae and Costa (19), the German version of the Ten Item Personality Inventory (TIPI-  
92 G) (20) was utilized. This inventory captures the five fundamental dimensions of the personality  
93 model, namely emotional stability (the opposite of neuroticism), extraversion, agreeableness,  
94 openness, and conscientiousness. The TIPI-G, which was designed as a concise version of the  
95 questionnaire, is particularly beneficial in situations with time constraints, as it provides a  
96 reliable estimate of the comprehensive measurements associated with the five-factor model of  
97 personality, such as those provided by the NEO-PI-R (21). The respondents employ a 7-point

98 Likert scale (ranging from 1 for "strongly disagree" to 7 for "strongly agree") to evaluate ten  
99 pairs of adjectives. The resulting scale score is the mean of two items, including one negatively  
100 worded item.

101 Pre-morbid somatization tendencies were assessed using the Screening for Somatoform  
102 Disorders (SOMS-2), a validated instrument commonly used in patient populations with  
103 psychosomatic disorders (22). In the first part of the questionnaire, participants were asked to  
104 report physical symptoms that were intermittent or persistent in the two years prior to the  
105 diagnosis of VS. These symptoms should have significantly interfered with their well-being or  
106 personal lifestyle, without a clearly identified cause as determined by medical professionals.  
107 The questionnaire presented a list of 53 somatoform symptoms, 5 specific to women and 1  
108 specific to men, based on criteria from the Diagnostic and Statistical Manual of Mental  
109 Disorders (DSM-IV-TR) and the International Classification of Diseases (ICD-10). The second  
110 section consisted of 15 questions designed to assess disability, frequency of medical  
111 consultations due to symptoms, and inclusion/exclusion criteria for all somatoform disorders.

112 We used the Hospital Anxiety and Depression Scale (HADS-D) to assess current symptoms of  
113 anxiety and depression (23). This questionnaire consists of two scales, one for anxiety and the  
114 other for depression, each ranging from 0 to 21. A total score, ranging from 0 to 42, was  
115 calculated based on symptoms experienced in the week prior to the assessment. Elevated scores  
116 indicated increased levels of anxiety, depression, or general psychological distress. The HADS-  
117 D serves as a screening tool, with scores greater than 8 warranting additional assessment for an  
118 affective disorder.

119 The statistical analysis was conducted using the statistical software package SPSS (24), with a  
120 significance level set at  $\alpha = 0.05$ . The normality of the dataset was evaluated through the  
121 application of the Shapiro-Wilk test, which indicated a non-normal distribution. As the  
122 objective of this explorative study was to gain a more comprehensive understanding of the  
123 relationships and differences among psychological factors and postoperative dizziness, we  
124 combined Chi-square tests, Mann-Whitney U-tests and correlation analyses. Chi-square tests  
125 were employed to ascertain discrepancies between the dizziness and non-dizziness groups with  
126 respect to dichotomous variables, including the presence of premorbid psychological disorders.  
127 Mann-Whitney U-tests provide insights into the differences between patient groups with and  
128 without dizziness, allowing us to identify significant disparities. In contrast, the use of  
129 Spearman correlation analysis ( $r_s$ ) within the dizziness group facilitates a more comprehensive  
130 examination of the precise dynamic relationships between these variables, thereby providing

131 insight into how they interact and potentially influence the severity or nature of dizziness. This  
132 dual approach enables a more nuanced interpretation of our findings, capturing both intergroup  
133 differences and intragroup associations. To address multiple testing, false discovery rate  
134 correction (25) was applied.

## 135 **Results**

### 136 *Sample characteristics*

137 A total of 93 participants were included in the final analysis, following the exclusion of eight  
138 individuals whose questionnaires were incomplete or lacked data regarding tumor size. Of the  
139 evaluated participants, 77 (82.8%) reported experiencing postoperative dizziness. It is  
140 noteworthy that over half of the patients surveyed indicated that they had also experienced  
141 dizziness prior to surgery. The participants' ages ranged from 23 to 85 years, with a mean age  
142 of 55.4 years (SD = 11.9). The mean age of the participants at the time of surgery was 46.7  
143 years (SD = 10.2), and the mean duration since treatment was 7.6 years (SD = 7.8). The  
144 preoperative dizziness severity scores, as measured by the Numerical Analog Scale (NAS),  
145 ranged from 1 to 10, with a mean score of 4.6 (SD = 2.7). Similarly, postoperative dizziness  
146 severity scores ranged from 1 to 10, with a mean score of 4.8 (SD = 2.7). A total of 18.2% of  
147 participants reported experiencing a severe degree of dizziness-related handicap. All patients  
148 who reported preoperative dizziness also experienced postoperative dizziness, and 29 patients  
149 (37.6%) reported that dizziness began to occur after surgery. Table 1 presents the descriptive  
150 statistics for the additional demographic variables and questionnaire scales. The descriptive  
151 data for the administered questionnaires are presented in Table 2.

152

153 Table 1.

154 Absolute and relative frequencies of demographic and dizziness handicap-related variables  
155 ( $N=77$ ).

|                            | n (%)     |
|----------------------------|-----------|
| female gender              | 55 (71.4) |
| Koos grade                 |           |
| 1                          | 11 (14.3) |
| 2                          | 17 (22.1) |
| 3                          | 30 (39.0) |
| 4                          | 19 (24.7) |
| preoperative<br>dizziness* | 46 (59.7) |
| headaches*                 | 28 (36.4) |
| tinnitus*                  | 38 (49.2) |



|                           |           |
|---------------------------|-----------|
| hearing loss <sup>†</sup> | 36 (46.8) |
| premorbid                 |           |
| psychological disorders   | 18 (23.4) |
| psychological ailments    | 28 (36.4) |
| dizziness handicap (DHI)  |           |
| mild                      | 44 (57.1) |
| moderate                  | 19 (24.7) |
| severe                    | 14 (18.2) |

156 *Note.* \* n = 2 missing, † n = 3 missing.

157 Table 2.

158 Descriptive data used questionnaires (N = 77)

| Questionnaire scales      | Minimum | Maximum | M (SD)       |
|---------------------------|---------|---------|--------------|
| <i>DHI-G</i>              |         |         |              |
| physical                  | 0       | 28      | 11.3 (6.9)   |
| emotional                 | 0       | 28      | 9.4 (7.4)    |
| functional                | 0       | 36      | 12.4 (8.2)   |
| total score               | 1       | 92      | 33.1 (20.6)  |
| <i>TIPI-G</i>             |         |         |              |
| extraversion              | 2       | 14      | 8.2 (3.1)    |
| agreeableness             | 6       | 14      | 10.8 (2.1)   |
| conscientiousness         | 7       | 14      | 12.4 (1.6)   |
| emotional stability       | 2       | 14      | 9.9 (3.0)    |
| openness                  | 4       | 14      | 10.3 (2.7)   |
| <i>GBI</i>                |         |         |              |
| global                    | -100    | 75      | -19.8 (33.8) |
| social support            | -83     | 67      | 1.7 (26.2)   |
| physical health           | -67     | 33      | -16.5 (28.6) |
| overall                   | -81     | 64      | -15.7 (24.8) |
| <i>SOMS-2</i>             |         |         |              |
| symptom count score       | 1       | 35      | 9.4 (7.3)    |
| somatization index ICD-10 | 1       | 14      | 3.8 (3.3)    |
| somatization index DSM-IV | 1       | 22      | 3.3 (4.2)    |
| <i>HADS-D</i>             |         |         |              |
| depression                | 0       | 21      | 4.9 (3.5)    |
| anxiety                   | 0       | 18      | 7.3 (3.7)    |
| total score               | 3       | 39      | 12.2 (6.4)   |

159 *Abbreviations.* DHI-G = Dizziness Handicap Inventory, TIPI-G = Ten Item Personality Inventory-German; GBI  
160 = Glasgow Benefit Inventory; SOMS-2 = Screening for Somatoform Disorders; HADS-D = Hospital Anxiety  
161 and Depression Scale.

162

163 *Differences between patients with and without postoperative dizziness*

164 A comparison of patients with and without postoperative dizziness revealed that those  
165 experiencing dizziness following surgery exhibited a higher mean symptom count score (M =



166 9.4, SD = 7.3 vs. M = 5.4, SD = 4.7,  $p < .05$ ) and higher levels of depression (M = 7.3, SD =  
167 3.8 vs. M = 5.1, SD = 3.8,  $p < .05$ ). No significant differences were identified with regard to  
168 personality traits or perceived health benefits. Patients who experienced postoperative dizziness  
169 exhibited a significantly higher prevalence of preoperative dizziness (n = 46 vs. 2,  $p = .001$ )  
170 and preoperative headaches (n = 28 vs. 1,  $p < .05$ ) compared to those who did not.

171

#### 172 *Associations between postoperative dizziness handicap and psychological factors*

173 After correcting for multiple comparisons, the analysis yielded several noteworthy correlations  
174 (see Table 3). With regard to the physical aspects of dizziness (DHI-P), the following  
175 significant correlations were identified: Conscientiousness demonstrated a positive correlation  
176 ( $r = .30$ , corrected  $p = .03$ ), as did social support ( $r = .32$ , corrected  $p = .02$ ). With regard to the  
177 emotional aspects of dizziness (DHI-E), the following significant correlations were identified:  
178 The Somatization Index DSM-IV demonstrated a correlation of  $r = .27$  (corrected  $p = .04$ ),  
179 while the HADS Depression and HADS Anxiety exhibited correlations of  $r = .31$  (corrected  $p$   
180  $= .03$ ) and  $r = .40$  (corrected  $p = .01$ ), respectively. For the functional aspects of dizziness (DHI-  
181 F), significant correlations were observed with conscientiousness ( $r = .31$ , corrected  $p = .03$ ),  
182 and the somatization index DSM-IV ( $r = .30$ , corrected  $p = .03$ ). The overall dizziness handicap  
183 (DHI total score) demonstrated significant correlations with conscientiousness ( $r = .30$ ,  
184 corrected  $p = .03$ ), social support ( $r = .32$ , corrected  $p = .03$ ), and the HADS total score ( $r = .36$ ,  
185 corrected  $p = .01$ ).

Table 3.

Correlation matrix for dizziness handicap (DHI-G), personality (TIPI-G), perceived health benefit (GBI), somatization tendencies (SOMS-2) and psychological burden (HADS-D)

|                           | DHI-P | <i>p</i> -value | corrected <i>p</i> -value | DHI-E | <i>p</i> -value | corrected <i>p</i> -value | DHI-F | <i>p</i> -value | corrected <i>p</i> -value | DHI total score | <i>p</i> -value | corrected <i>p</i> -value |
|---------------------------|-------|-----------------|---------------------------|-------|-----------------|---------------------------|-------|-----------------|---------------------------|-----------------|-----------------|---------------------------|
| age                       | .04   | .75             | >.99                      | -.04  | .74             | >.99                      | .05   | .65             | >.99                      | .02             | .89             | >.99                      |
| gender                    | .28   | .01             | .12                       | .14   | .22             | >.99                      | .17   | .13             | >.99                      | .21             | .07             | .77                       |
| tumor size (Koos)         | -.00  | .98             | >.99                      | .02   | .89             | >.99                      | -.09  | .418            | >.99                      | -.04            | .73             | >.99                      |
| <i>TIPI-G</i>             |       |                 |                           |       |                 |                           |       |                 |                           |                 |                 |                           |
| extraversion              | -.10  | .38             | .48                       | -.02  | .88             | .88                       | -.05  | .69             | .74                       | -.07            | .52             | .62                       |
| agreeableness             | -.04  | .75             | .79                       | -.06  | .59             | .66                       | -.06  | .59             | .66                       | -.07            | .55             | .65                       |
| conscientiousness         | .30   | .008            | .03*                      | .19   | .10             | .17                       | .31   | .007            | .03*                      | .30             | .01             | .03*                      |
| emotional stability       | -.16  | .16             | .27                       | -.24  | .04             | .09                       | -.10  | .38             | .46                       | -.18            | .12             | .19                       |
| openness                  | -.10  | .38             | .48                       | -.14  | .22             | .31                       | -.11  | .36             | .46                       | -.14            | .22             | .31                       |
| <i>GBI</i>                |       |                 |                           |       |                 |                           |       |                 |                           |                 |                 |                           |
| global                    | -.21  | .07             | .14                       | .23   | .047            | .10                       | -.37  | <.001           | .01*                      | -.40            | <.001           | .01*                      |
| social support            | .32   | .004            | .02*                      | -.26  | .023            | .06                       | .28   | .014            | .04*                      | .32             | .005            | .03*                      |
| physical health           | -.03  | .80             | .83                       | -.26  | .023            | .06                       | -.21  | .07             | .14                       | -.19            | .09             | .16                       |
| total                     | -.12  | .32             | .45                       | -.50  | <.001           | .01*                      | -.35  | .002            | .01*                      | -.35            | .002            | .01*                      |
| <i>SOMS-2</i>             |       |                 |                           |       |                 |                           |       |                 |                           |                 |                 |                           |
| symptom count score       | .02   | .86             | .87                       | .17   | .14             | .22                       | .19   | .10             | .17                       | .15             | .21             | .31                       |
| somatization index DSM-IV | .18   | .11             | .18                       | .27   | .017            | .04*                      | .30   | .008            | .03*                      | .28             | .013            | .04*                      |
| somatization index ICD-10 | -.21  | .07             | .14                       | -.05  | .69             | .74                       | -.06  | .59             | .66                       | -.11            | .37             | .48                       |
| <i>HADS-D</i>             |       |                 |                           |       |                 |                           |       |                 |                           |                 |                 |                           |
| depression                | .07   | .52             | .62                       | .31   | .006            | .03*                      | .26   | .023            | .06                       | .26             | .024            | .06                       |
| anxiety                   | .21   | .06             | .13                       | .40   | <.001           | .01*                      | .31   | .006            | .03*                      | .35             | .002            | .01*                      |
| total                     | .19   | .09             | .16                       | .40   | <.001           | .01*                      | .34   | .002            | .01*                      | .36             | .001            | .01*                      |

*Abbreviations.* DHI-G = Dizziness Handicap Inventory, DHI-P = physical aspects, DHI-E = emotional aspects, DHI-F = functional aspects, TIPI-G = Ten Item Personality Inventory-German; GBI = Glasgow Benefit Inventory; SOMS-2 = Screening for Somatoform Disorders; HADS-D = Hospital Anxiety and Depression Scale.

## 186 **Discussion**

187 To the best of our knowledge, this is the first study to examine the associations between long-  
188 term dizziness and psychological factors, such as personality and somatization, in VS patients  
189 who underwent retrosigmoid microsurgery. An understanding of these relationships is essential  
190 for the development of more effective treatment strategies that address both the physical and  
191 psychological dimensions of dizziness in this patient population.

192 The observation that a significant proportion of patients experienced dizziness both pre- and  
193 postoperatively is consistent with previous research indicating that pre-existing vestibular  
194 symptoms are a strong predictor of postoperative dizziness (1–3). The elevated mean symptom  
195 count score and levels of depression in patients with postoperative dizziness serve to underscore  
196 the lasting impact of these symptoms on patients' well-being. This finding supports the  
197 assertion of Carlson et al. that persistent dizziness is a critical predictor of long-term reduction  
198 in quality of life in VS patients (5). However, in contrast to the findings of Carlson et al, we  
199 found no significant associations between age, gender, tumor size, and dizziness handicap.

200 The significant correlations between dizziness and psychological factors offer a more profound  
201 comprehension of dizziness in VS patients. Specifically, a positive correlation was observed  
202 between conscientiousness and the physical and functional aspects of dizziness of patients with  
203 VS. This indicates that patients with higher levels of conscientiousness may experience  
204 disparate patterns of dizziness or demonstrate more effective coping mechanisms. In contrast,  
205 elevated levels of depression and anxiety were markedly linked to high levels of both emotional  
206 and functional dizziness handicap. These findings are consistent with those of previous studies  
207 that have highlighted the role of psychological distress in exacerbating dizziness and its  
208 associated disability (6–8).

209 The correlation between the somatization index (DSM-IV) and the emotional aspects of  
210 dizziness provides further evidence that somatic symptoms and psychological distress might be  
211 closely linked. This is consistent with findings from research on chronic subjective dizziness  
212 and PPPD, which have demonstrated elevated levels of somatic symptom burden in these  
213 conditions (11, 12).

214 The positive correlation between social support and the physical and overall handicap of  
215 dizziness indicates that patients with more robust social support networks may experience less  
216 severe physical symptoms and overall handicap. This finding is consistent with the results of

217 previous research indicating that social support can mitigate the impact of chronic conditions  
218 on quality of life (7).

219 The significant correlations identified in this study underscore the necessity of addressing  
220 psychological factors in the management of dizziness in VS patients. The integration of  
221 psychological assessments and interventions, such as cognitive-behavioral therapy or vestibular  
222 rehabilitation combined with psychological support, may prove beneficial especially in those  
223 with premorbid dizziness problems and/or other psychophysiological/emotional problems. This  
224 approach could assist in addressing the multifaceted nature of dizziness, thereby improving  
225 both physical symptoms and overall QoL. In accordance with the recommended treatment  
226 strategies for PPPD, psychotherapy should incorporate an educational component that  
227 elucidates the manner in which symptoms arise from altered sensory processing and postural  
228 control, frequently precipitated by a past stressor or vestibular disorder. Although maladaptive  
229 beliefs and postural habits may have developed, they are susceptible to modification. While  
230 complete remission of symptoms may not always be attainable, a substantial improvement  
231 remains a realistic and promising outcome (26).

232

### 233 *Strength and limitations*

234 This study's principal strength is its comprehensive investigation of a range of psychological  
235 variables, including premorbid psychological disorders, personality traits, somatization  
236 tendencies, and current levels of depression and anxiety. By integrating these factors, the study  
237 provides a nuanced understanding of how psychological characteristics interact with dizziness  
238 severity in VS patients. The study identified several significant correlations between  
239 psychological factors and different aspects of dizziness, which adds valuable insight into the  
240 complex relationship between these variables. For instance, the observed associations between  
241 conscientiousness, social support, and the severity of dizziness highlight the multifaceted nature  
242 of dizziness and its psychological impacts.

243 The cross-sectional design of the study precludes the possibility of drawing causal inferences,  
244 as it is unable to ascertain the direction of the relationships between psychological factors and  
245 dizziness. To ascertain causality and the temporal dynamics of these factors, longitudinal  
246 studies are required. Although the sample size was relatively large, the generalizability of the  
247 findings may be limited due to the combined single-center and online approach of the study and  
248 the potential for center-specific biases to influence the results. The use of self-report  
249 questionnaires may introduce a degree of bias, and the incorporation of objective assessments

250 could enhance the accuracy of the evaluation. The high prevalence of preoperative dizziness  
251 among those with postoperative symptoms suggests that a preexisting condition may affect  
252 outcomes. However, the study does not fully examine this interaction. Furthermore, the study  
253 does not examine coping mechanisms or interventions that could mitigate the impact of  
254 psychological factors on dizziness, underscoring the necessity for future research in this  
255 domain.

256 Nevertheless, it is essential to evaluate the psychometric properties of the DHI, which, despite  
257 its pervasive utilization, may exhibit suboptimal properties, as evidenced by extant research  
258 (27). Despite the DHI's limitations, it remains the most commonly utilized tool due to the lack  
259 of a more robust alternative in the existing literature. It is recommended that future research  
260 focus on validating and enhancing the current measurement tools, as well as investigating  
261 effective coping strategies and interventions to more effectively manage the impact of  
262 psychological factors on dizziness.

263

## 264 **Conclusion**

265 In conclusion, this study identifies a significant correlation between psychological factors and  
266 the severity of dizziness in patients with VSs. It is noteworthy that higher levels of  
267 conscientiousness, as well as increased somatization and anxiety, are associated with greater  
268 handicap due to dizziness. These findings highlight the necessity of considering psychological  
269 factors in the management of postoperative dizziness, with the potential to enhance patient  
270 outcomes. Thus, careful assessment of psychological factors especially with regard to  
271 premorbid emotional and psychophysiological functioning should be implemented in clinical  
272 routine. It would be beneficial for future research to focus on longitudinal studies in order to  
273 gain a deeper understanding of the causal relationships between psychological factors and  
274 postoperative dizziness in VS patients, as well as to identify effective coping strategies or  
275 interventions that could be used to mitigate the impact of these factors on dizziness.

## **Ethical approval**

All subjects gave their informed consent for inclusion before they participated in the study. The study was conducted in accordance with the Declaration of Helsinki, and the protocol was approved by the Ethics Committee of University Hospital Halle (No. 2020-008).

## **Informed Consent Statement**

Informed consent was obtained from all subjects involved in the study.

## **Data Availability Statement**

The data presented in this study are available on request from the corresponding author. The data are not publicly available due to privacy reasons.

## **Conflict of Interest**

The authors declare that the research was conducted in the absence of any commercial or financial relationships that could be construed as a potential conflict of interest.

## **Funding**

-

## **Acknowledgments**

We gratefully acknowledge the support provided by Vereinigung Akustikusneurinom e.V.

## **References**

1. Batuecas-Caletrio A, Santa Cruz-Ruiz S, Muñoz-Herrera A, Perez-Fernandez N. The map of dizziness in vestibular schwannoma. *The Laryngoscope*. 2015;125(12):2784–9.
2. Carlson ML, Tveiten ØV, Driscoll CL, Neff BA, Shepard NT, Eggers SD, et al. Long-term Dizziness Handicap in Patients with Vestibular Schwannoma: A Multicenter Cross-sectional Study. *Otolaryngol Neck Surg*. 2014 Dec 1;151(6):1028–37.
3. Fuentealba-Bassaletti C, Neve OM, van Esch BF, Jansen JC, Koot RW, van Benthem PPG, et al. Vestibular Complaints Impact on the Long-Term Quality of Life of Vestibular Schwannoma Patients. *Otol Neurotol Off Publ Am Otol Soc Am Neurotol Soc Eur Acad Otol Neurotol*. 2023 Feb 1;44(2):161–7.
4. Nilsen KS, Lund-Johansen M, Nordahl SHG, Finnkirk M, Goplen FK. Long-term Effects of Conservative Management of Vestibular Schwannoma on Dizziness, Balance, and Caloric Function. *Otolaryngol Neck Surg*. 2019 Nov 1;161(5):846–51.



5. Carlson ML, Tveiten ØV, Driscoll CL, Goplen FK, Neff BA, Pollock BE, et al. What drives quality of life in patients with sporadic vestibular schwannoma? *The Laryngoscope*. 2015;125(7):1697–702.
6. Breivik CN, Nilsen RM, Myrseth E, Finnkirk MK, Lund-Johansen M. Working disability in Norwegian patients with vestibular schwannoma: vertigo predicts future dependence. *World Neurosurg*. 2013 Dec;80(6):e301-305.
7. Neve OM, Jansen JC, van der Mey AGL, Koot RW, de Ridder M, van Benthem PPG, et al. The impact of vestibular schwannoma and its management on employment. *Eur Arch Oto-Rhino-Laryngol Off J Eur Fed Oto-Rhino-Laryngol Soc EUFOS Affil Ger Soc Oto-Rhino-Laryngol - Head Neck Surg*. 2022 Jun;279(6):2819–26.
8. Ribeyre L, Spitz E, Frère J, Gauchard G, Parietti-Winkler C. Correlations between postural control and psychological factors in vestibular schwannoma patients. *J Vestib Res Equilib Orientat*. 2016 Nov 3;26(4):387–94.
9. Saman Y, Mcllellan L, Mckenna L, Dutia MB, Obholzer R, Libby G, et al. State Anxiety Subjective Imbalance and Handicap in Vestibular Schwannoma. *Front Neurol* [Internet]. 2016 Jul 13 [cited 2024 Sep 13];7. Available from: <https://www.frontiersin.org/journals/neurology/articles/10.3389/fneur.2016.00101/full>
10. Aksoy S, Cekic S. The Relationship Between Vertigo/Dizziness and Somatoform Complaints: A Systematic Review. *Indian J Otolaryngol Head Neck Surg*. 2024 Feb 1;76(1):1434–46.
11. Kantekin Y, Karaaslan Ö, Dağistan H, Can İH. Evaluation of anxiety sensitivity, depression, and personality characteristics in chronic subjective dizziness patients. *J Surg Med*. 2020 Jan 2;4(1):33–7.
12. Trinidad A, Harman P, Stone J, Staab JP, Goebel JA. Assessment of Potential Risk Factors for the Development of Persistent Postural-Perceptual Dizziness: A Case-Control Pilot Study. *Front Neurol* [Internet]. 2021 Jan 21 [cited 2024 Sep 12];11. Available from: <https://www.frontiersin.org/journals/neurology/articles/10.3389/fneur.2020.601883/full>
13. Trinidad A, Cabreira V, Goebel JA, Staab JP, Kaski D, Stone J. Predictors of persistent postural-perceptual dizziness (PPPD) and similar forms of chronic dizziness precipitated by peripheral vestibular disorders: a systematic review. *J Neurol Neurosurg Psychiatry*. 2023 Nov 1;94(11):904–15.
14. Kozak HH, Dündar MA, Uca AU, Uğuz F, Turgut K, Altaş M, et al. Anxiety, Mood, and Personality Disorders in Patients with Benign Paroxysmal Positional Vertigo. *Arch Neuropsychiatry*. 2018 Mar 19;55(1):49–53.

15. Thomas M, Rampp S, Scheer M, Strauss C, Prell J, Schönfeld R, et al. Premorbid Psychological Factors Associated with Long-Term Postoperative Headache after Microsurgery in Vestibular Schwannoma—A Retrospective Pilot Study. *Brain Sci.* 2023 Aug 7;13(8):1171.
16. Koos WT, Day JD, Matula C, Levy DI. Neurotopographic considerations in the microsurgical treatment of small acoustic neurinomas. *J Neurosurg.* 1998;88(3):506–12.
17. Kurre A, Bastiaenen CH, van Gool CJ, Gloor-Juzi T, de Bruin ED, Straumann D. Exploratory factor analysis of the Dizziness Handicap Inventory (German version). *BMC Ear Nose Throat Disord.* 2010;10:1–10.
18. Robinson K, Gatehouse S, Browning GG. Measuring patient benefit from otorhinolaryngological surgery and therapy. *Ann Otol Rhinol Laryngol.* 1996;105(6):415–22.
19. McCrae RR, Costa PT. Validation of the five-factor model of personality across instruments and observers. *J Pers Soc Psychol.* 1987;52(1):81.
20. Muck PM, Hell B, Gosling SD. Ten-Item Personality Inventory--German Version. *Eur J Psychol Assess.* 2011;
21. Costa Jr PT, McCrae RR. *The Revised Neo Personality Inventory (neo-pi-r)*. Sage Publications, Inc; 2008.
22. Rief W, Hiller W, Heuser J. *Screening für somatoforme Störungen (SOMS)*. Hogrefe Göttingen; 2008.
23. Herrmann-Lingen CB U; Snaith, RP. *HADS-D Hospital Anxiety and Depression Scale. Deutsche Version*. Bern: Huber; 2002.
24. IBM Corp. *IBM SPSS Statistics for Mac*. Armonk, NY: IBM Corp; 2021.
25. Benjamini Y, Hochberg Y. Controlling the false discovery rate: a practical and powerful approach to multiple testing. *J R Stat Soc Ser B Methodol.* 1995;57(1):289–300.
26. Scarff JR, Lippmann S. Treating Psychiatric Symptoms in Persistent Postural Perceptual Dizziness. *Innov Clin Neurosci.* 2023 Dec 1;20(10–12):49–54.
27. Koppelaar-van Eijsden HM, Schermer TR, Bruintjes TD. Measurement properties of the dizziness handicap inventory: a systematic review. *Otol Neurotol.* 2022;43(3):e282–97.
